# Supplementary material
Source: PubMed Central journal article supplement (PMC6874214)
Supplement: NIHMS1030884-supplement-Supp_figS1.pdf [file NIHMS1030884-supplement-Supp_figS1.pdf]

a

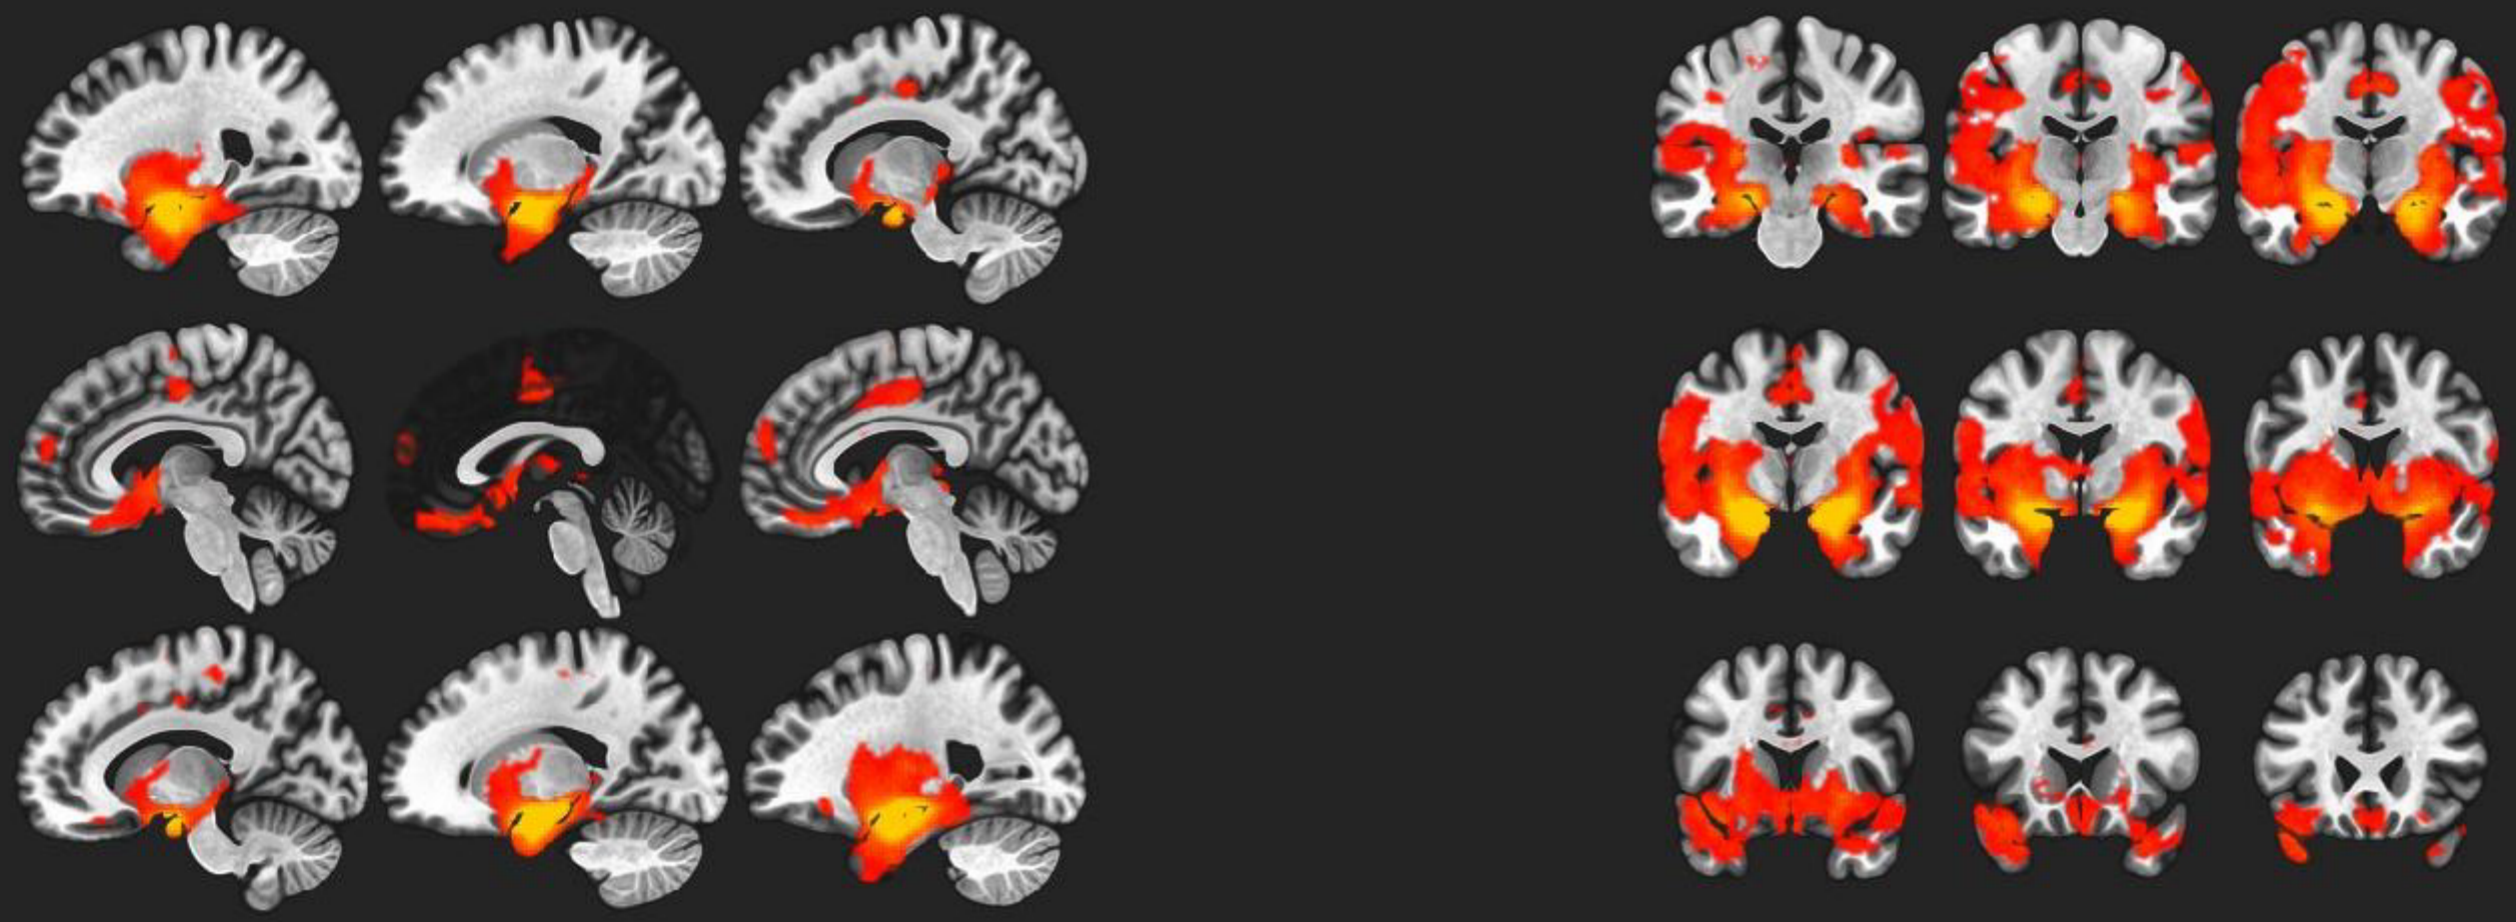

b

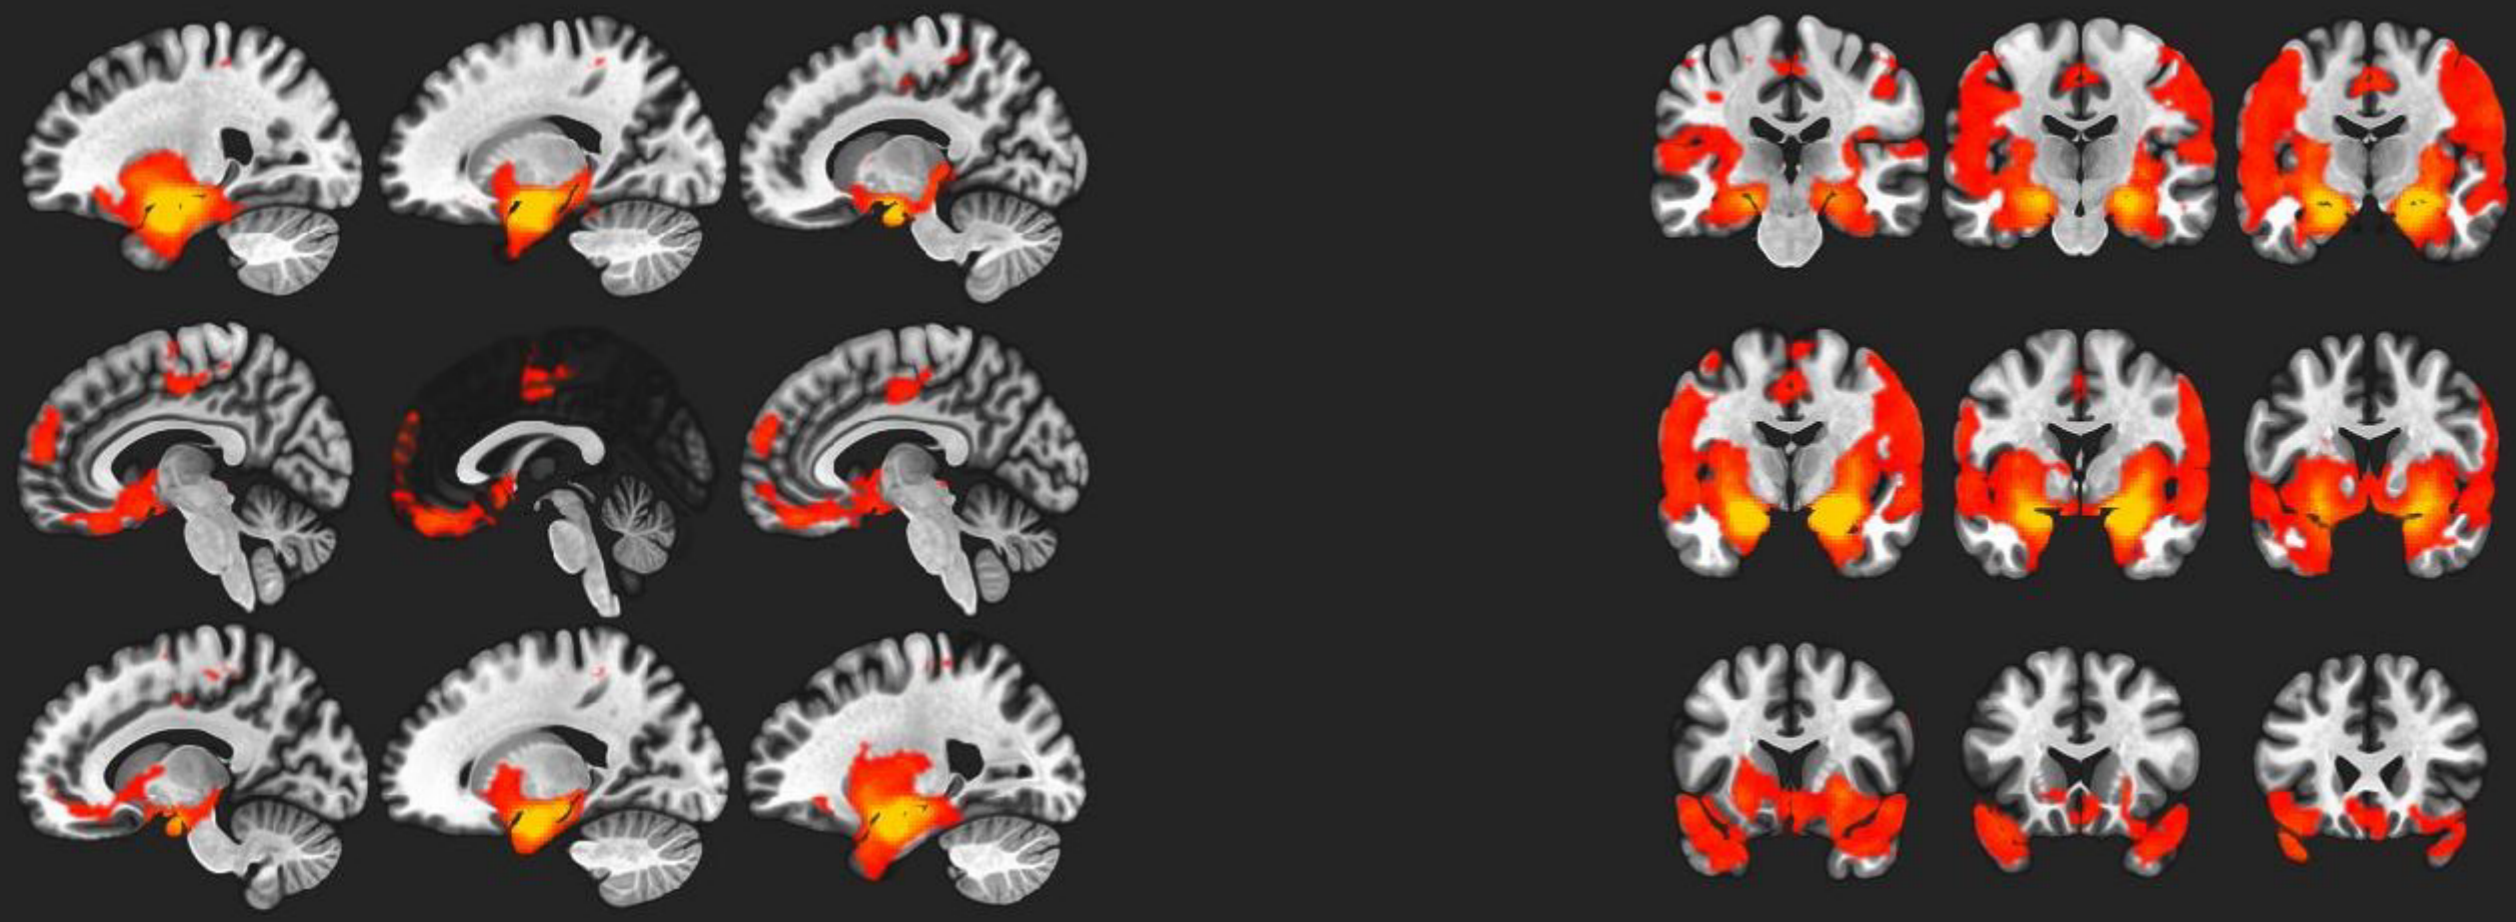

(a) Resting state functional connectivity for the left amygdala seed. (b) Resting state functional connectivity for the right amygdala.
